# Supplementary material for: CTCF-mediated topological boundaries during development foster appropriate gene regulation
Source: PubMed Central journal article supplement — Genes Dev. 2016 Dec 15;30(24):2657–62. doi: 10.1101/gad.288324.116 (PMC5238725; doi:10.1101/gad.288324.116), 2016-12-15
Supplement: supp_gad.288324.116_Supplemental_FigS3.pdf [file supp_gad.288324.116_Supplemental_FigS3.pdf]

# Supplemental\_Fig\_S3

ESC WT

Chromosome 6

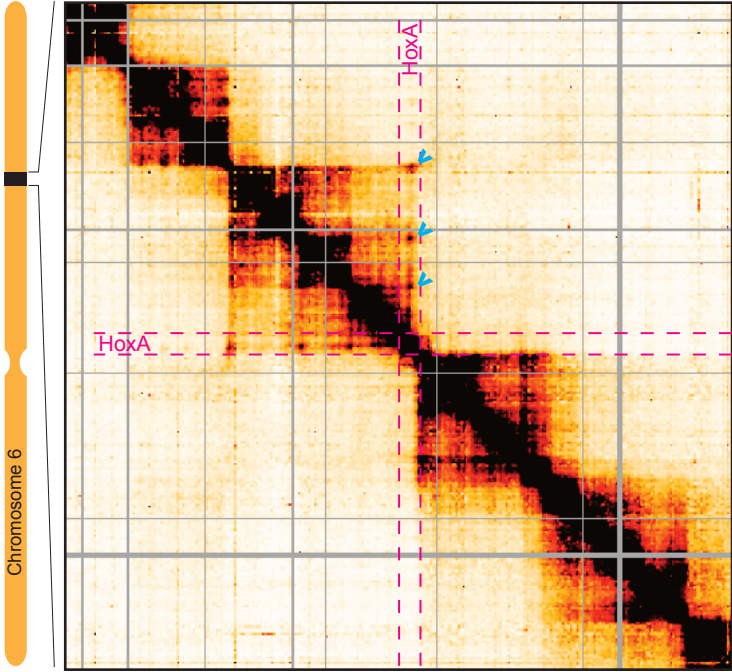

Heatmaps scale: 0-10

ESC *Hoxa* $\Delta$ 5|6:7|9

Chromosome 6

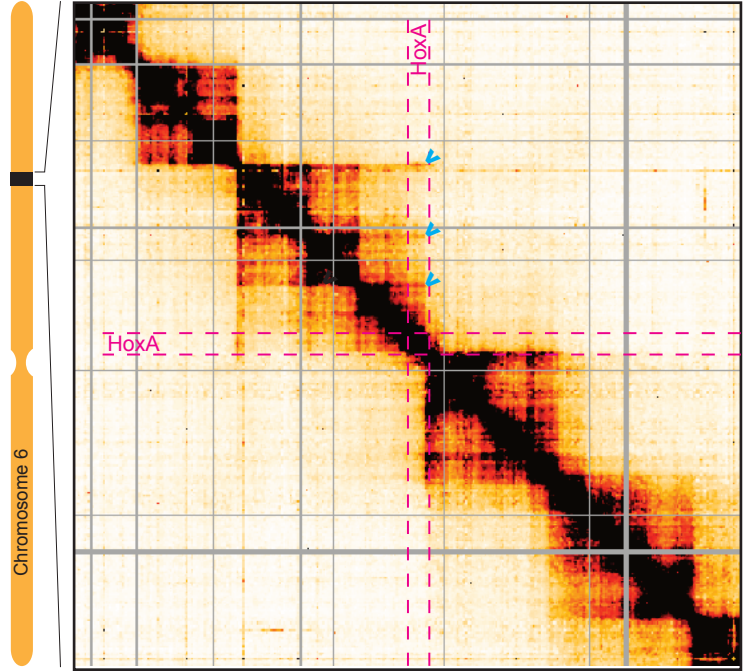

Heatmap scale: 0-10

MN WT

Chromosome 6

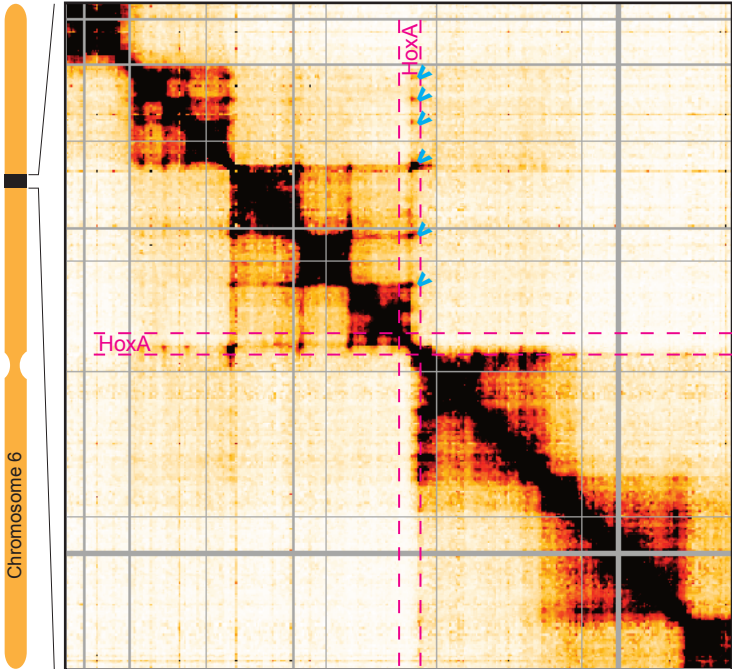

Heatmap scale: 0-10

MN *Hoxa* $\Delta$ 5|6:7|9

Chromosome 6

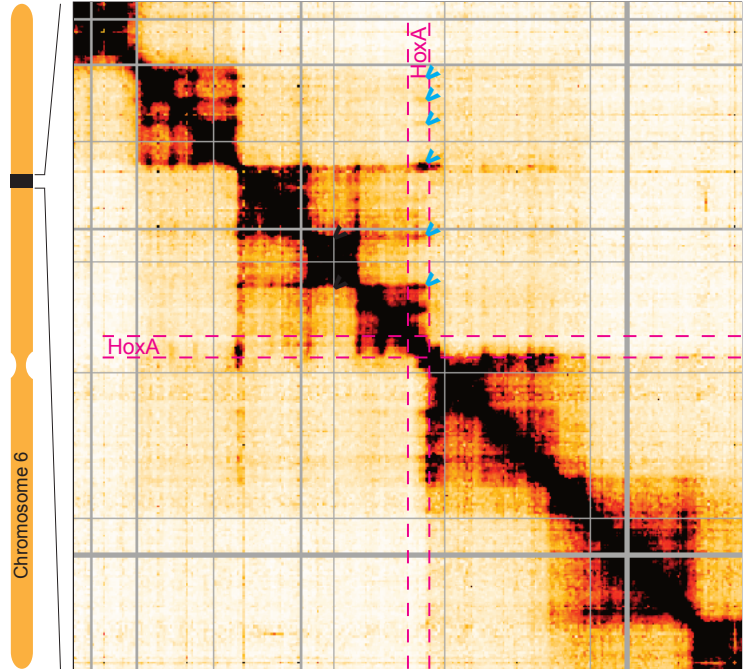

Heatmap scale: 0-10
