# Supplementary material for: CTCF-mediated topological boundaries during development foster appropriate gene regulation
Source: PubMed Central journal article supplement — Genes Dev. 2016 Dec 15;30(24):2657–62. doi: 10.1101/gad.288324.116 (PMC5238725; doi:10.1101/gad.288324.116), 2016-12-15
Supplement: supp_gad.288324.116_Supplemental_FigS4.pdf [file supp_gad.288324.116_Supplemental_FigS4.pdf]

A

WT MNs vs WT ESCs

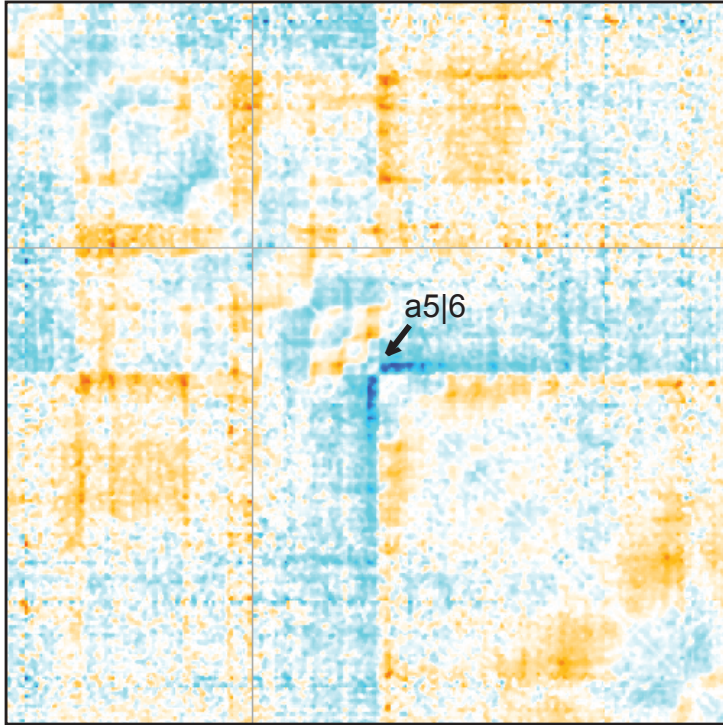

Heatmap scale: -5 5

*Hoxa* $\Delta$ 5|6:7|9 MNs vs *Hoxa* $\Delta$ 5|6:7|9 ESCs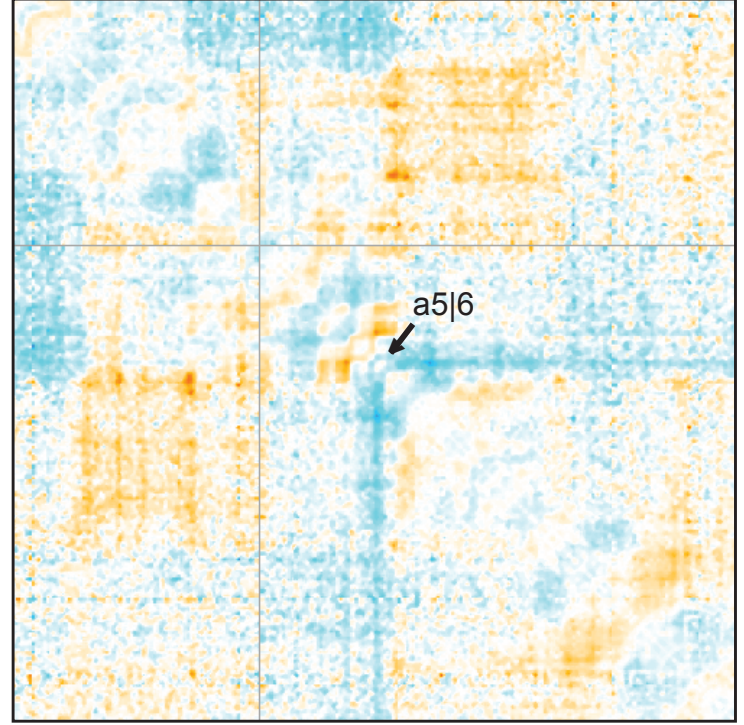

Heatmap scale: -5 5

B

*Hoxa* $\Delta$ 5|6:7|9 vs WT (ESCs)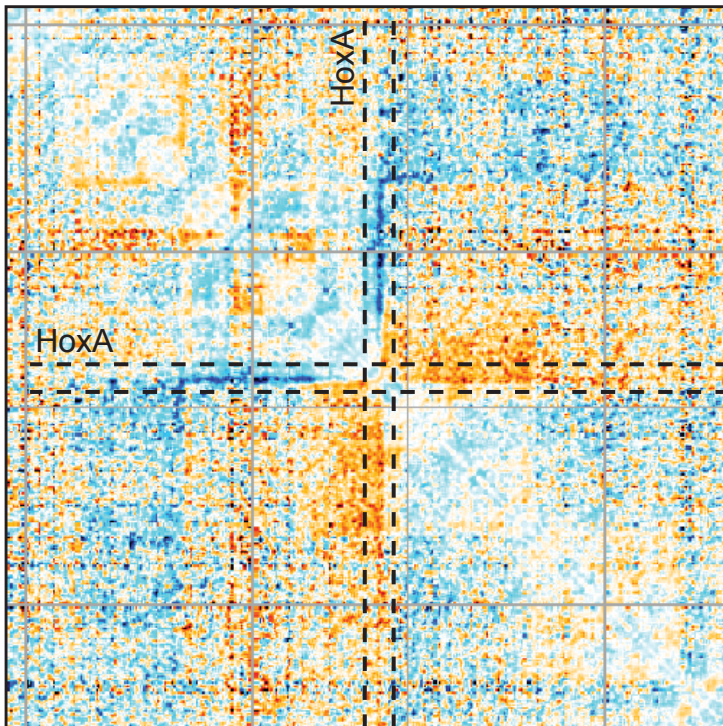

Heatmap scale: -1.5 1.5

*Hoxa* $\Delta$ 5|6:7|9 vs WT (MNs)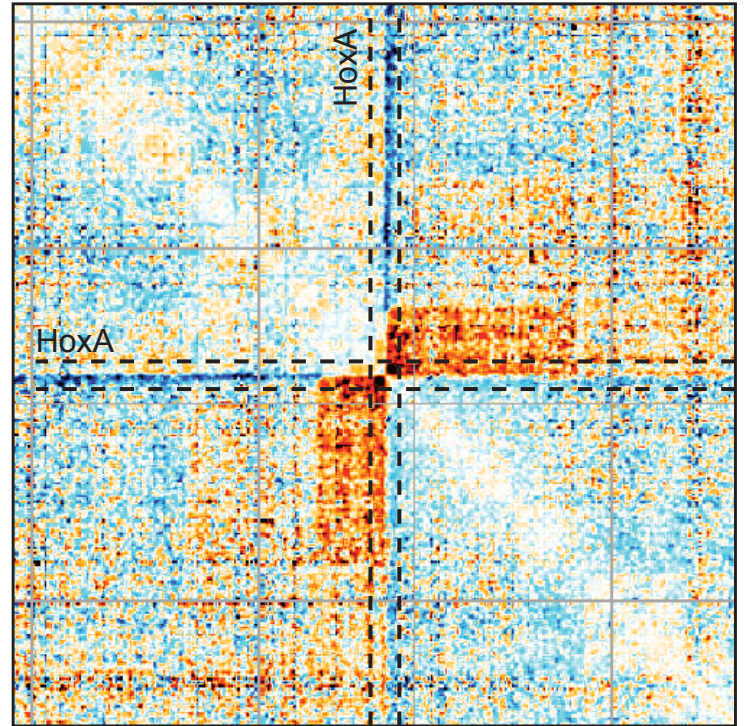

Heatmap scale: -1.5 1.5
