# Supplementary figures and images for: CTCF-mediated topological boundaries during development foster appropriate gene regulation
Source: PubMed Central journal article supplement — Genes Dev. 2016 Dec 15;30(24):2657–62. doi: 10.1101/gad.288324.116 (PMC5238725; doi:10.1101/gad.288324.116), 2016-12-15

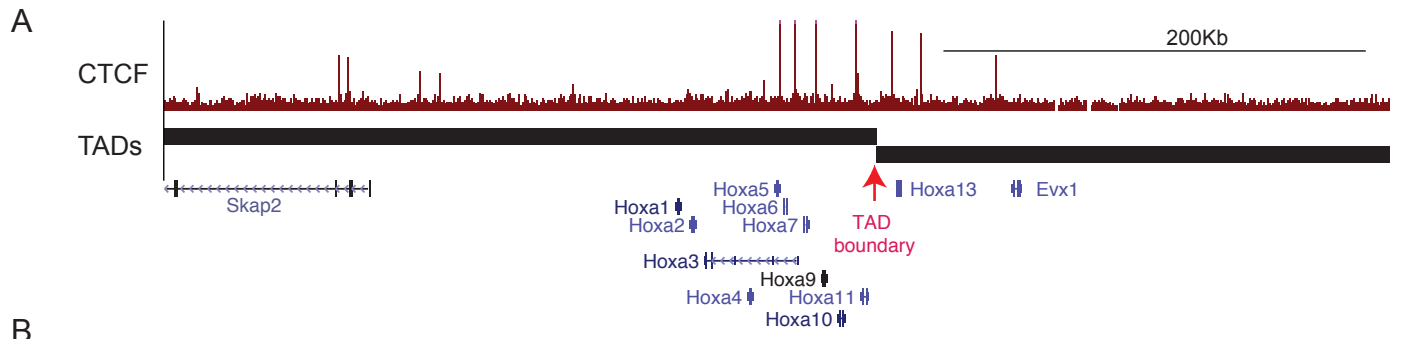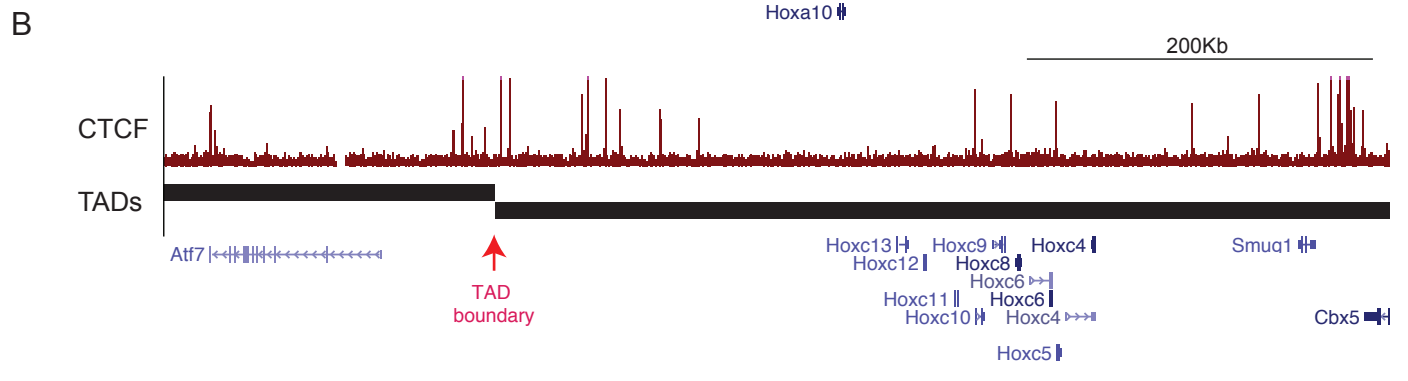

Supplement: supp_gad.288324.116_Supplemental_FigS1.pdf [file supp_gad.288324.116_Supplemental_FigS1.pdf]

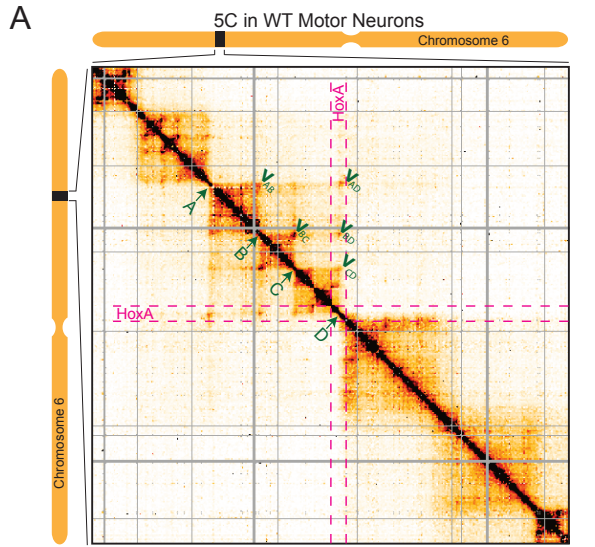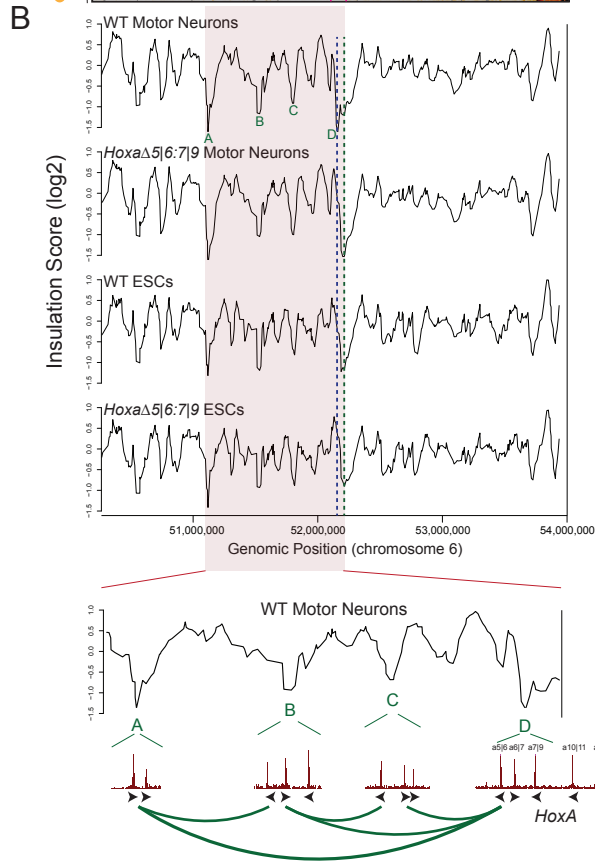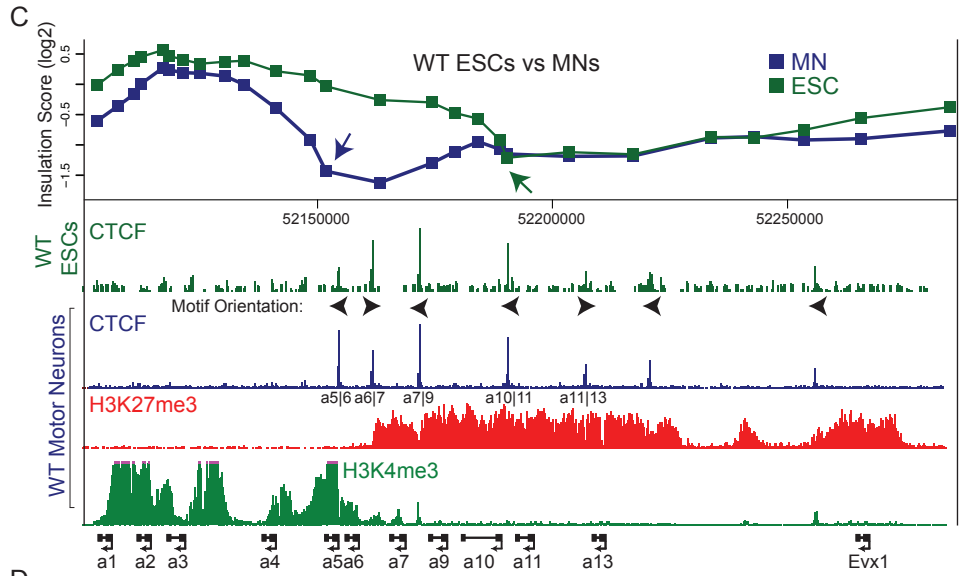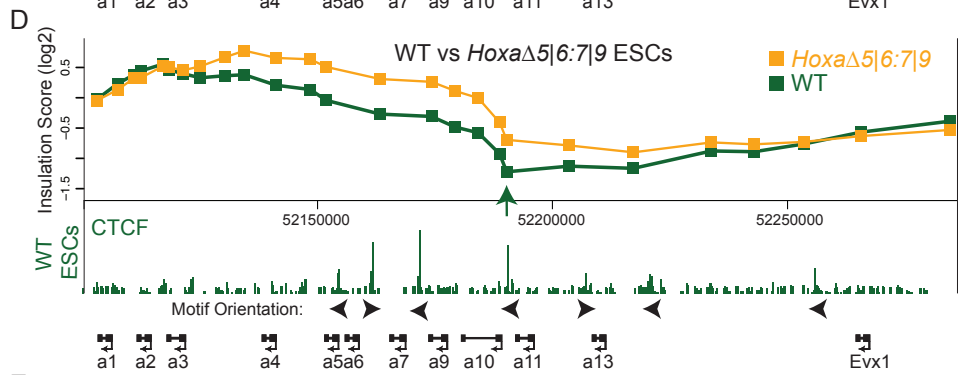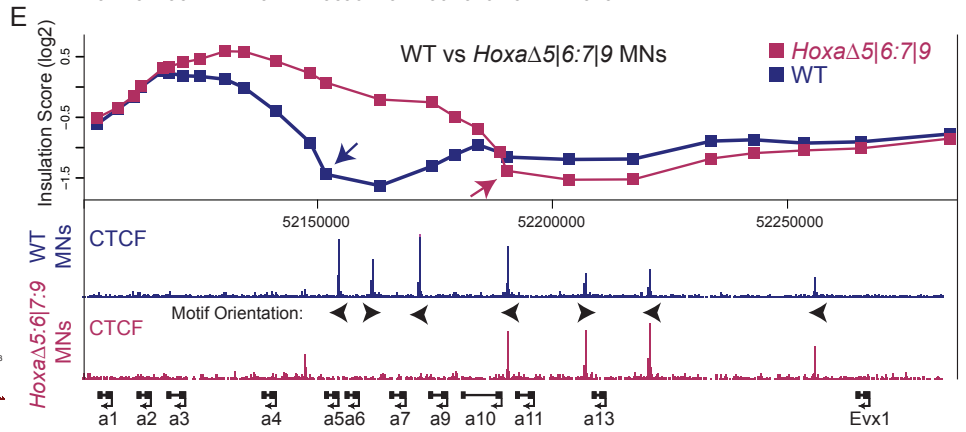

Supplement: supp_gad.288324.116_Supplemental_FigS2.pdf [file supp_gad.288324.116_Supplemental_FigS2.pdf]

A

*HoxA*

CTCF

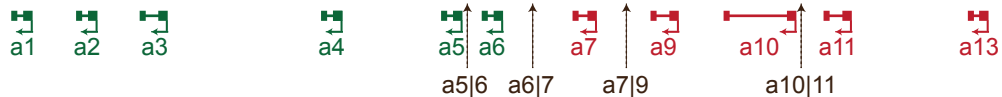

*Hoxa*Δ5|6 CTCF mutation:

*Hoxa*Δ7|9 CTCF mutation:

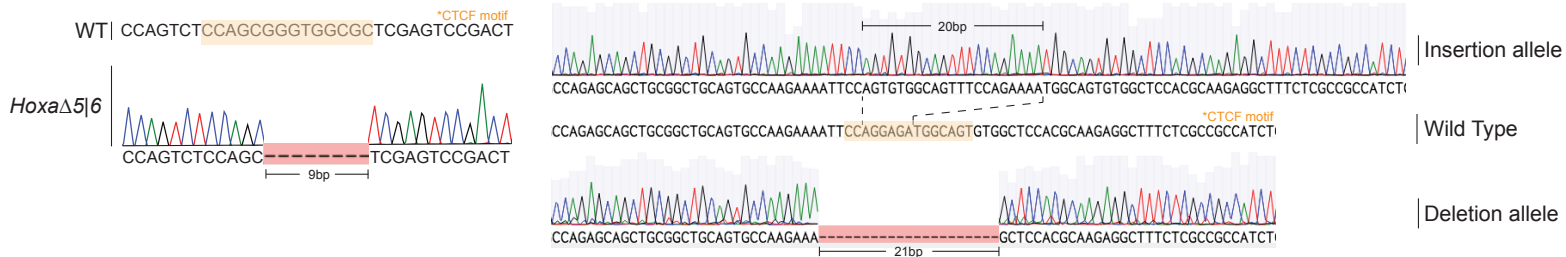

B

*HoxC*

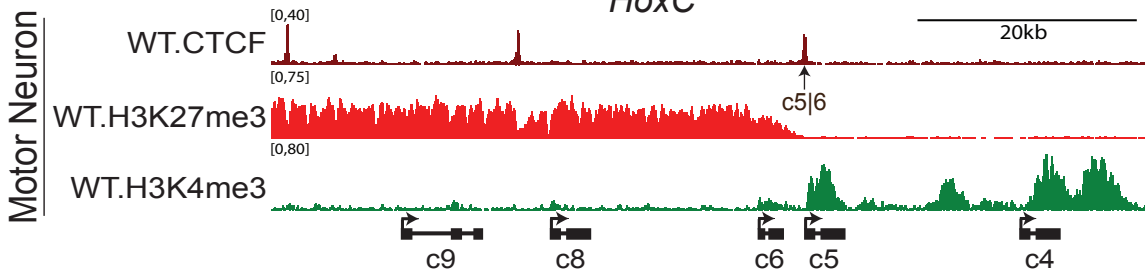

*Hoxc*Δ5|6 CTCF mutation:

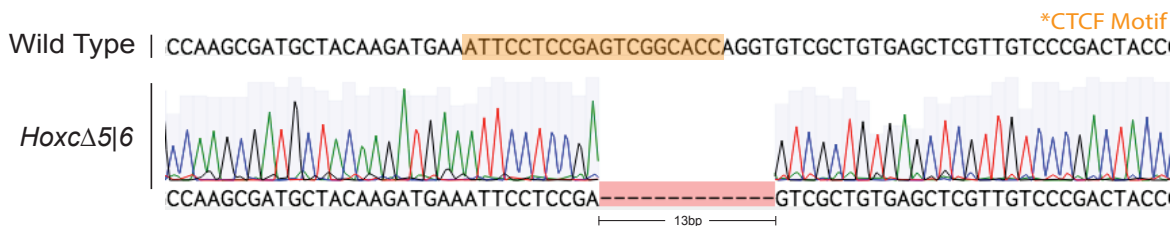

Supplement: supp_gad.288324.116_Supplemental_FigS5.pdf [file supp_gad.288324.116_Supplemental_FigS5.pdf]
